# Supplementary material for: Systemic Oxidative Stress Is Increased in Postmenopausal Women and Independently Associates with Homocysteine Levels
Source: MDPI journal article supplement (doi:10.3390/ijms21010314), 2020-01-02
Supplement: s1 [file s1]

**Table S1.** Cohort characteristics with comparison between reproductive (premenopausal) women and (post)menopausal women.

| Variables                   | Reproductive women | Menopausal women | P-value†         |
|-----------------------------|--------------------|------------------|------------------|
|                             | <i>n</i> = 223     | <i>n</i> = 118   |                  |
| Free thiols (μM)            | 780.3 ± 80.9       | 762.9 ± 85.3     | 0.065<br><0.001* |
| Age (years)*                | 30 [22;42]         | 54 [50;59]       | < 0.001          |
| <u>Place of living</u>      |                    |                  |                  |
| Rural                       | 59 (26.5)          | 5 (4.2)          | < 0.001          |
| Urban                       | 164 (73.5)         | 113 (95.8)       |                  |
| <u>Marital status</u>       |                    |                  |                  |
| Unmarried                   | 92 (41.4)          | 0 (0.0)          | < 0.001          |
| Married                     | 125 (56.3)         | 100 (84.7)       |                  |
| Widow                       | 2 (0.9)            | 16 (13.6)        |                  |
| Divorcee                    | 3 (1.4)            | 2 (1.7)          |                  |
| No. of pregnancies*         | 1 [0;5]            | 10 [7;12]        | < 0.001          |
| No. of abortions*           | 0 [0;0]            | 1 [0;2]          | < 0.001          |
| <u>Gestational diabetes</u> |                    |                  |                  |
| Yes                         | 26 (11.7)          | 18 (15.3)        | 0.346            |
| No                          | 197 (88.3)         | 100 (84.7)       |                  |
| BMI (kg/m²)                 | 26.1 ± 5.9         | 29.2 ± 5.5       | < 0.001          |
| Waist circumference (cm)    | 83.4 ± 18.2        | 97.5 ± 11.2      | < 0.001          |
| Waist/hip ratio*            | 0.86 [0.77;0.93]   | 1.00 [0.92;1.06] | < 0.001          |
| Fat percentage*             | 40.2 [32.9;47.4]   | 45.2 [38.5;49.5] | < 0.001          |
| Muscle percentage*          | 24.2 [22.4;26.4]   | 22.3 [20.6;24.5] | < 0.001          |
| Visceral fat*               | 6.0 [4.0;8.0]      | 10.0 [8.0;11.0]  | < 0.001          |
| <b>Biochemistry</b>         |                    |                  |                  |
| Total cholesterol (mmol/L)  | 4.8 ± 1.1          | 6.3 ± 1.1        | < 0.001          |
| Triglycerides (mmol/L)*     | 0.8 [0.7;1.2]      | 1.2 [1.0;1.7]    | < 0.001          |
| LDL (mmol/L)                | 3.0 ± 1.0          | 4.2 ± 1.0        | < 0.001          |
| HDL (mmol/L)*               | 1.4 [1.2;1.6]      | 1.4 [1.2;1.7]    | 0.675            |
| VLDL (mmol/L)*              | 0.4 [0.3;0.5]      | 0.6 [0.5;0.8]    | < 0.001          |
| Glucose (mmol/L)*           | 5.6 [5.2;5.9]      | 6.1 [5.6;6.5]    | < 0.001          |
| Apo A1 (g/L)*               | 1.6 [1.4;1.7]      | 1.7 [1.5;1.9]    | < 0.001          |
| Apo B (g/L)*                | 0.9 [0.7;1.0]      | 1.2 [1.1;1.4]    | < 0.001          |
| Homocysteine (μmol/L)*      | 8.8 [7.8;10.2]     | 9.5 [8.0;11.3]   | 0.014            |

|                               |                  |                  |         |
|-------------------------------|------------------|------------------|---------|
| HbA1c (%)*                    | 5.4 [5.1;5.6]    | 5.7 [5.4;6.0]    | < 0.001 |
| Insulin resistance (HOMA-IR)* | 2.3 [1.6;3.3]    | 2.4 [1.6;3.8]    | 0.458   |
| <b>Hormone levels</b>         |                  |                  |         |
| FSH (mIU/mL)*                 | 6.5 [5.5;8.1]    | 67.6 [47.6;86.7] | < 0.001 |
| Estradiol (pg/mL)*            | 37.2 [28.1;47.7] | 5.0 [5.0;11.1]   | < 0.001 |
| Progesterone (ng/mL)*         | 0.5 [0.3;0.7]    | 0.2 [0.1;0.3]    | < 0.001 |
| Testosterone (ng/mL)*         | 0.23 [0.15;0.33] | 0.16 [0.11;0.26] | < 0.001 |
| LH/FSH*                       | 0.9 [0.7;1.2]    | 0.6 [0.3;0.9]    | < 0.001 |

Data are presented as mean  $\pm$  standard deviation (SD) or proportions n with corresponding percentages (%).

\*Skewed variables are presented as median [interquartile range]. <sup>†</sup>P-values were two-tailed and calculated using independent sample t-tests or Mann-Whitney U-tests, as appropriate. P-values < 0.05 were considered statistically significant. \*Difference after correction for age, P-value derived from linear regression analysis. Abbreviations: BMI, body mass index; LDL, low-density lipoprotein; HDL, high-density lipoprotein; VLDL, very-low-density lipoprotein; HbA1c, hemoglobin A1c; FSH, follicular stimulating hormone; LH, luteinizing hormone.
